# Supplementary material
Source: PubMed Central journal article supplement (PMC5876839)
Supplement: jamadermatol-154-447-s001.pdf [file jamadermatol-154-447-s001.pdf]

## Supplementary Online Content

Schneider-Burrus S, Jost A, Peters EMJ, Witte-Haendel E, Sterry W, Sabat R. Association of Hidradenitis Suppurativa With Body Image. *JAMA Dermatol*. Published online February 21, 2018. doi:10.1001/jamadermatol.2017.6058

**eTable 1.** The Frankfurt Body Concept Scale (FKKS) Consists of 9 Different Subscales With a Total of 64 Items

**eTable 2.** Demographic Characteristics of Patients With HS and Controls

**eTable 3.** Frankfurt Body Concept Scale (FKKS) in Patients With HS and Controls

**eTable 4.** Correlation of the Frankfurt Body Concept Scale (FKKS) With the Severity of Disease (Sartorius Score) in Patients With HS

**This supplementary material has been provided by the authors to give readers additional information about their work.**

**eTable 1.** The Frankfurt Body Concept Scale (FKKS) Consists of 9 Different Subscales With a Total of 64 Items

|   |                                                                                                          |
|---|----------------------------------------------------------------------------------------------------------|
| 1 | 'Health' (6 Items, e.g. 'I feel healthy')                                                                |
| 2 | 'Body care and taking care of body functioning'<br>(8 Items, e.g. 'I make sure to have a healthy diet')  |
| 3 | 'Physical efficacy' (10 Items, e.g. 'I am strong')                                                       |
| 4 | 'Body contact' (6 Items, e.g. 'I avoid every type of physical contact')                                  |
| 5 | 'Sexuality' (6 Items, e.g. 'I worry about sexual things')                                                |
| 6 | 'Self-acceptance of one's body'<br>(6 Items, e.g. 'I have more physical deficits than others')           |
| 7 | 'Acceptance of one's body by others'<br>(4 Items, e.g. 'Other people usually do not find me attractive') |
| 8 | 'Physical appearance' (14 Items, e.g. 'I dislike the colour of my hair')                                 |
| 9 | 'Dissimilating body processes'<br>(4 Items, e.g. 'My body odor is unpleasant')                           |

**eTable 2.** Demographic Characteristics of Patients With HS and Controls

|                                                            | HS patients                  | Controls                     | <i>P</i> -value |
|------------------------------------------------------------|------------------------------|------------------------------|-----------------|
| Women (%)                                                  | 56.5 %                       | 51.2%                        | 0.614           |
| Men (%)                                                    | 43.5%                        | 48.8%                        | 0.614           |
| Age in years<br>(mean $\pm$ SEM)<br><sup>48</sup>          | 34.26 $\pm$ 1.54<br>(18-59)  | 37.07 $\pm$ 1.63<br>(20-59)  | 0.213           |
| Height in cm,<br>(mean $\pm$ SEM) <sup>48</sup>            | 174 $\pm$ 0.01<br>(150-197)  | 176 $\pm$ 0.02<br>(153-193)  | 0.257           |
| Weight in kg<br>(mean $\pm$ SEM) <sup>48</sup>             | 90.26 $\pm$ 2.74<br>(55-147) | 89.56 $\pm$ 4.28<br>(47-170) | 0.395           |
| BMI (kg/m <sup>2</sup> )<br>(mean $\pm$ SEM) <sup>48</sup> | 30.24 $\pm$ 1.10<br>(19-50)  | 28.74 $\pm$ 1.37<br>(19-54)  | 0.106           |

The *P*-values calculated by the Chi-square test (sex distribution) or Mann–Whitney U test (age, height, weight and BMI).

**eTable 3.** Frankfurt Body Concept Scale (FKKS) in Patients With HS and Controls

| Frankfurt Body Concept Scales                      | HS Patients   | Controls      | <i>P</i> -value |
|----------------------------------------------------|---------------|---------------|-----------------|
| 1. 'Health'                                        | 20.00 ± 0.92  | 27.12 ± 0.95  | <b>0.000</b>    |
| 2. 'Body care and taking care of body functioning' | 31.57 ± 0.86  | 35.56 ± 0.83  | <b>0.003</b>    |
| 3. 'Physical efficacy'                             | 35.84 ± 1.19  | 44.81 ± 1.27  | <b>0.000</b>    |
| 4. 'Body contact'                                  | 22.00 ± 1.01  | 24.21 ± 0.96  | 0.139           |
| 5. 'Sexuality'                                     | 21.11 ± 0.90  | 27.59 ± 0.71  | <b>0.000</b>    |
| 6. ' Self-acceptance of one's body '               | 17.56 ± 0.74  | 23.02 ± 0.78  | <b>0.000</b>    |
| 7. 'Acceptance of one's body by others'            | 11.20 ± 0.54  | 14.00 ± 0.49  | <b>0.000</b>    |
| 8. 'Physical appearance'                           | 58.98 ± 1.35  | 64.00 ± 1.49  | <b>0.011</b>    |
| 9. 'Dissimilating body processes'                  | 16.27 ± 0.50  | 17.93 ± 0.47  | <b>0.031</b>    |
| Frankfurt Body Concept Scale                       | 234.21 ± 5.43 | 278.23 ± 5.76 | <b>0.000</b>    |

The *P*-values calculated by the Mann–Whitney U test are indicated.

**eTable 4.** Correlation of the Frankfurt Body Concept Scale (FKKS) With the Severity of Disease (Sartorius Score) in Patients With HS

| Frankfurt Body Concept Scales                      | Spearman correlation | <i>P</i> -value |
|----------------------------------------------------|----------------------|-----------------|
| 1. 'Health'                                        | -0.453               | <b>0.002</b>    |
| 2. 'Body care and taking care of body functioning' | 0.238                | 0.063           |
| 3. 'Physical efficacy'                             | -0.410               | <b>0.005</b>    |
| 4. 'Body contact'                                  | -0.247               | 0.110           |
| 5. 'Sexuality'                                     | -0.156               | 0.317           |
| 6. ' Self-acceptance of one's body '               | -0.477               | <b>0.001</b>    |
| 7. 'Acceptance of one's body by others'            | -0.147               | 0.341           |
| 8. 'Physical appearance'                           | -0.069               | 0.647           |
| 9. 'Dissimilating body processes'                  | 0.076                | 0.625           |
| Frankfurt Body Concept Scale                       | -0.237               | 0.146           |

The Correlation coefficient and *P*-values calculated by the Spearman rank order correlation test are indicated.
